# Supplementary material for: The Safety and Toxicity of Phage Therapy: A Review of Animal and Clinical Studies
Source: MDPI journal article supplement (doi:10.3390/v13071268), 2021-06-29
Supplement: s1 [file s1]

## Supplementary Figures

Animal Studies- Route of Administration

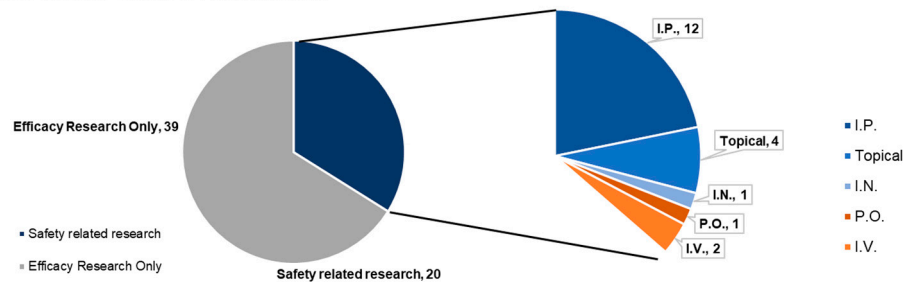

Case Reports

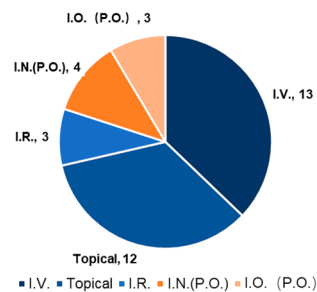

Clinical Trials

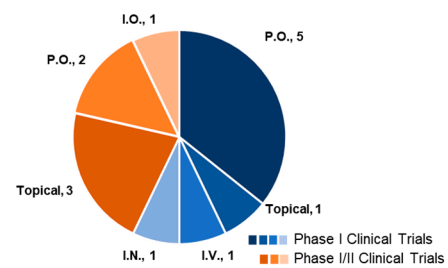

**Figure S1. Animal studies and clinical studies of phage therapy 2008-2021.** Our review included 59 animal studies of phage therapy. Of these, 20 examined safety measures in some capacity. Routes of phage administration included intraperitoneal (I.P.), inhalational (I.N.), topical, oral (P.O.), intravenous (I.V.). 35 case reports of phage therapy were included in humans. Of these, therapy was administered by I.V., single or combined with other administration, topical, intrarectal (I.R.), I.N., with or without P.O., Intravesical (I.O.), with or without P.O. This review also included 14 clinical trials in humans. the routes of administration included P.O., Topical, I.N., I.V. and I.O.

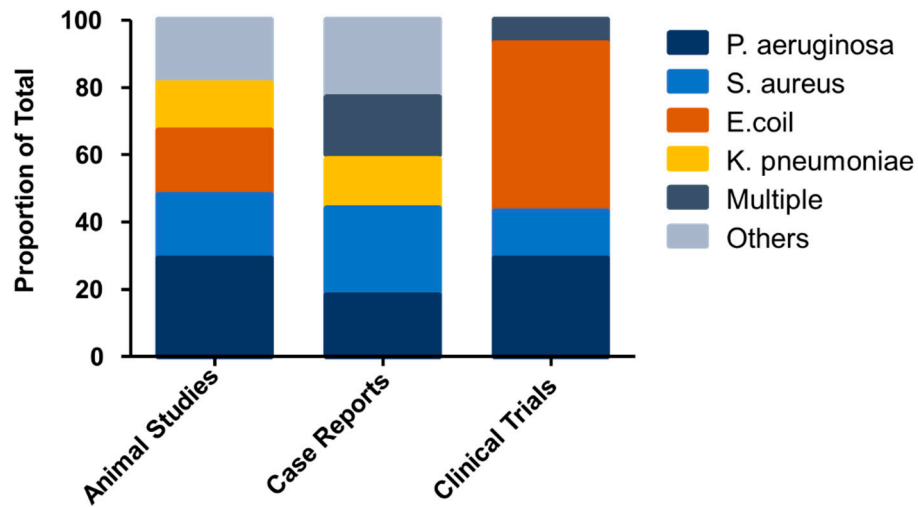

**Figure S2. Pathogens targeted in phage therapy studies.** The percentage of cases that targeted specific pathogens are shown for animal studies, case reports and clinical trials. The target pathogens in animal studies included *P. aeruginosa*, *S. aureus*, *E. coli*, *K. pneumoniae*, or other pathogens. The target pathogens in case reports were *P. aeruginosa*, *S. aureus*, and *K. pneumoniae*, multiple pathogens infection, and other pathogens. The major pathogens of interest in clinical trials were *E. coli*, *P. aeruginosa*, *S. aureus*, and multiple pathogens infection. “Other pathogens” include: *Enterococcus faecalis*, *Mycobacterium*, *Achromobacter xylosoxidans*, *Acinetobacter baumannii*, *Vibrio cholerae*, *Cronobacter spp.*

**Supplementary Table S1. Animal Studies of Phage Therapy (6/20)**

| Reference                                     | Animal model                                 | Phage administration              | Main safety outcomes                                                                                                                                                                                       |
|-----------------------------------------------|----------------------------------------------|-----------------------------------|------------------------------------------------------------------------------------------------------------------------------------------------------------------------------------------------------------|
| Dufour, et al. 2019 [17] <b>France</b>        | Mice<br><i>E. coli</i><br>pneumonia          | Phages 536_P1 and LM33_P<br>I.V.  | No difference in behavior and weight, Cytokine concentration in lung and blood: phage 536_P1 alone promoted a weak increase of anti-viral cytokines (INF- $\gamma$ and IL-12) and chemokines in the lungs. |
| Fong, et al. 2019 [20]                        | Sheep<br><i>P. aeruginosa</i><br>sinuses     | PA phage cocktail<br>Topical      | Phage was detected in blood, No loss of appetite, fever, or other signs of systemic illness, No significant changes in blood chemistry, SEM show no change in assess cilia.                                |
| Drilling, et al. 2017 [19]                    | Sheep<br><i>S. aureus</i><br>Sinusitis       | Phage cocktail NOV012;<br>Topical | No infectious phages in serum; General Health: appetite, fever, systemic illness; SEM shows no changes in cilia morphology.                                                                                |
| Drilling, et al. 2014 [18]                    | Sheep<br><i>S. aureus</i> ;<br>sinusitis     | phage cocktail (CTSA)<br>Topical  | No Phage in kidney, spleen, liver, and brain; SEM showed no change in assess cilia.                                                                                                                        |
| Chhibber, et al. 2008 [104]                   | Mice<br><i>K. Pneumoniae</i><br>pneumoniae   | phage SS<br>I.P.                  | No change in rectal temperature lethargy or sickness; No toxicity in mice.                                                                                                                                 |
| Jongsoo, el.at. 2019 [105]                    | Mice<br><i>P. aeruginosa</i> ;<br>pneumoniae | phages R656, R1836<br>I.P.        | No difference in survival; No difference in the levels of TNF- $\alpha$ and IL-6 in the lungs; HE showed no toxicity in lung sections.                                                                     |
| Chang, et al. 2018 [91]                       | Mice<br><i>P. aeruginosa</i><br>Pneumoniae   | Phage PEV20<br>I.N.               | Level of phages in plasma was low Histopathological examination showed no lung toxicity.                                                                                                                   |
| Gelman, et al. 2018 [97]                      | Mice<br><i>E. faecalis</i><br>peritonitis    | Phage EFDG1, EFLK1<br>I.P.        | No difference in physical condition; Phage alone mildly increase the level of TNF- $\alpha$ ; Phages alone did not result in any adverse effects.                                                          |
| Cheng, et al. 2017 [98]                       | Mice<br><i>E. faecalis</i><br>bacteremia     | Phage EF-P29<br>I.P.              | No difference in health scores or body weight between normal.                                                                                                                                              |
| Oechslin, et al. 2016 [21] <b>Switzerland</b> | Rat<br><i>P. aeruginosa</i><br>Endocarditis  | Phage cocktail PP1131<br>I.V.     | Phage detected in blood, spleen, kidney, liver, lung, and brain; IL-1 $\beta$ , IL-6 increased plasma levels may relate to phage-induced bacterial lysis.                                                  |

|                                                       |                                                   |                                     |                                                                                                                                                                                                        |
|-------------------------------------------------------|---------------------------------------------------|-------------------------------------|--------------------------------------------------------------------------------------------------------------------------------------------------------------------------------------------------------|
| Galtier, et al. 2016<br>[45] <b>France.</b>           | Mice<br><i>E. coli</i><br>intestinal colonization | Phage AL505<br>P.O.                 | A lower impact on microbiota composition compared to antibiotic treatment.                                                                                                                             |
| Jun, et al. 2014 [23]                                 | Mice female<br><i>Vibrio</i><br>parahaemolyticus  | pVp-1<br>I.P. or P.O.               | No changes in physical condition and survival; Titers of IgG and IgM against the phage increased by 170-fold and 50-fold, respectively. No adverse events were observed                                |
| Takemura-Uchiyama, et al. 2014 [106]                  | Mice<br><i>S. aureus</i><br>septicaemia           | Phage S13'<br>I.P.;                 | No unusual behavior or deaths were observed.                                                                                                                                                           |
| Osanai, et.al. 2012<br>[107]                          | Mice<br><i>K. Pneumoniae</i><br>bacteremia        | Phage cocktail<br>I.P.              | Phage shows in blood samples; No fever or general lethargy 30 days after injection; no adverse effects.                                                                                                |
| Pouillot, et al. 2012<br>[108] <b>France</b>          | Rat<br><i>E. coli</i><br>Sepsis and<br>Meningitis | Phage S242<br>I.P. or s.c.          | High concentration in blood, spleen and kidney, low in brain at 2-24 h; no difference in weight gain; no sign of toxicity.                                                                             |
| Ľubomíra Tóthová et al. 2011 [109]<br><b>Slovakia</b> | Mice<br><i>Cronobacter</i><br>UTI                 | Cronobacter-specific phage<br>I.P.  | No adverse effects were reported.                                                                                                                                                                      |
| Hung, et al. 2011<br>[110]                            | Mice<br><i>K. pneumoniae</i><br>Bacteremia        | bacteriophage NK-5<br>I.P. vs. P.O. | No difference in survival rate; phage alone resulted in no elevation of AST and ALT, TNF- $\alpha$ , IL-6, MCP-1, IFN- $\gamma$ , IL-10, and IL-12 p70 levels; No death or adverse effect.             |
| Hawkins, et al. 2010<br>[111] <b>UK</b>               | Dog<br><i>P. aeruginosa</i><br>otitis             | Cocktail with Six phages<br>Topical | No treatment related inflammation was detected; no related adverse events.                                                                                                                             |
| Sunagar, et al. 2010<br>[22]                          | Mice<br><i>S. aureus</i><br>bacteremia            | Phage GRCS<br>I.P.                  | No anaphylactic reactions or changes in core body temperature; titers of IgG and IgM against the phage increased above the background by 2500-fold and 100-fold respectively. No other adverse events. |
| Nishikawa, et al. 2008<br>[112]                       | Mice<br><i>E. coli</i><br>UTI                     | phages T4 and KEP10<br>I.P.         | No adverse effects according the physical exam and survival data                                                                                                                                       |

---

**Supplementary Table S2. Case Reports of Phage Therapy (16/ 35)**

| Reference                                                    | Case                                                                                         | Phage administration                                 | Main safety outcomes                                                                                                                              |
|--------------------------------------------------------------|----------------------------------------------------------------------------------------------|------------------------------------------------------|---------------------------------------------------------------------------------------------------------------------------------------------------|
| Lebeaux et al., 2021 [113]<br>Belgium                        | 12-year-old male lung-transplanted cystic fibrosis<br><i>A. xylosoxidans</i>                 | phage against <i>A. xylosoxidans</i> ;<br>Inhale     | Clinical tolerance was perfect<br>No details.                                                                                                     |
| Ferry et al., 2020 [114]<br>France                           | Three case with <i>S. aureus</i> prosthetic joint infection                                  | PP1493, PP1815, PP1957<br>Topical                    | No safety monitoring.                                                                                                                             |
| Bao et al., 2020 [115]                                       | 63-year-old female UTI with <i>K. pneumoniae</i> infection                                   | phages against <i>K. pneumoniae</i> .<br>Topical     | No adverse occurred<br>No details.                                                                                                                |
| Cano, et al.2020 [116]                                       | 62-year-old male; <i>K. pneumoniae</i> prosthetic knee infection                             | KpJH46Φ2<br>I.V.                                     | No treatment-related adverse effects and remained asymptomatic 34 weeks after completing treatment.                                               |
| Rostkowska, et al. 2020 [117]<br>Poland                      | 60-year-old male; <i>K. pneumoniae</i> UTI                                                   | phage against <i>K. pneumoniae</i> ;<br>Intrarectal  | No adverse reactions or intolerance reported.                                                                                                     |
| Doub, et al. 2020 [24]                                       | 72-year-old male; <i>S. aureus</i> prosthetic joint infection.                               | SaGR51'1;<br>I.A. + I.V.                             | Albumin decreased, therapy was stopped due to transaminitis.                                                                                      |
| Rubalskii et al.2020 [118]<br>Germany                        | Case series of Cardiothoracic Surgery Related Infections                                     | Multiple phages;<br>Topical or I.N.                  | No adverse events reported.                                                                                                                       |
| Gainey et al.2020 [119]                                      | 10-year-old female <i>Achromobacter</i> CF                                                   | Phage Ax2CJ45Φ2<br>I.V.                              | No adverse events reported.                                                                                                                       |
| Aslam et al.2019 [120]                                       | 3 lung transplant patients<br><i>P. aeruginosa</i> or <i>B. dolosa</i>                       | AB-PA01; Navy phage cocktail; BdPF16phi4281;<br>I.V. | Clinical and laboratory parameters were tested. No phage-related adverse events were identified                                                   |
| Nir-Paz et al. 2019 [121]<br>Israel (associated state of EU) | A 42-year-old male<br><i>Acinetobacter baumannii</i> and <i>K. pneumoniae</i> bone infection | /<br>I.V.                                            | No adverse events related to phage were noted clinically or on laboratory monitoring (liver function tests, complete blood counts, electrolytes). |
| Tkhilaishvili et al. 2019 [122]<br>Germany                   | 80-year-old female<br><i>P. aeruginosa</i> Joint Infection                                   | /<br>Topical                                         | No adverse events reported.                                                                                                                       |
| Onsea et al.2019 [123]                                       | Case series                                                                                  | BFC1 cocktail<br>Pyo bacteriophage                   | Clinical status was evaluated daily. No adverse events reported.                                                                                  |

|                              |                                                                                    |                                                  |                                                                                                                                                                        |
|------------------------------|------------------------------------------------------------------------------------|--------------------------------------------------|------------------------------------------------------------------------------------------------------------------------------------------------------------------------|
| Belgium                      | Musculoskeletal Infections                                                         | Topical                                          |                                                                                                                                                                        |
| Corbellino et al. 2019 [124] | 57-year-old<br><i>K. pneumoniae</i><br>gut infection                               | oral + I.R.                                      | No adverse events reported.                                                                                                                                            |
| Switzerland                  |                                                                                    |                                                  |                                                                                                                                                                        |
| Susan, et al. 2019 [125]     | 77-year-old female;<br><i>P. aeruginosa</i> ;<br>pneumonia                         | AB-PA01;<br>I.V.+ Inhale;                        | Well-tolerated with no adverse events detected either during therapy or subsequently.                                                                                  |
| Gilbey, et al. 2019 [89]     | 65-year-old male<br><i>S. aureus</i><br>Endocarditis                               | AB-SA01<br>I.V.                                  | No fevers, tachycardia, hypotension or rashes were detected after phage infusions and no adverse sequelae were attributable to the therapy.                            |
| Law, et al. 2019 [90]        | 26-year-old female<br><i>P. aeruginosa</i><br>CF                                   | AB-PA01<br>I.V.                                  | No adverse events were noted clinically or by lab exam                                                                                                                 |
| RM, et al. 2019 [28]         | 15-year-old<br><i>Mycobacterium abscessus</i><br>CF                                | BPs33ΔHTH-HRM10 and<br>ZoeJΔ45<br>I.V. + Topical | Sera showed weak phage-neutralization antibody and cytokine responses. Diaphoresis and flushing but no fever or changes. No adverse reactions to phage administration. |
| Kuipers et al. 2019 [126]    | 58-year-old male<br>Klebsiella<br>pneumoniae<br>UTI                                | /<br>oral + I.O.                                 | No adverse events occurred.                                                                                                                                            |
| Netherlands                  |                                                                                    |                                                  |                                                                                                                                                                        |
| Duplessis, et al. 2018 [10]  | A 2-year-old male<br><i>P. aeruginosa</i><br>bacteremia;                           | phage cocktail<br>I.V.                           | Without identified host humoral responses targeting phage; Phage was withheld for decompensation concerning for anaphylaxis.                                           |
| LaVergne et al. 2018 [27]    | 77-year-old male<br><i>A. baumannii</i><br>brain injury surgical related infection | <i>A. baumannii</i> phage<br>I.V.                | Brief episode hypotension after the first dose.                                                                                                                        |
| Ferry et al. 2018 [127]      | 80-year-old female<br><i>S. aureus</i><br>prosthetic joint infection               | <i>S. aureus</i> phage<br>Topical                | No adverse events reported to phage therapy.                                                                                                                           |
| France                       |                                                                                    |                                                  |                                                                                                                                                                        |
| Fish, et al. 2018 [128]      | 63-year-old female<br><i>S. aureus</i><br>Osteomyelitis                            | Sb-1;<br>Topical                                 | No safety monitoring.                                                                                                                                                  |
| Ferry, et al. 2018 [85]      | 60-year-old male<br><i>S. aureus</i><br>bone and joint infection                   | Phage cocktail<br>Topical                        | No safety monitoring.                                                                                                                                                  |
| France                       |                                                                                    |                                                  |                                                                                                                                                                        |

|                                                |                                                                                  |                                              |                                                                                                                                                         |
|------------------------------------------------|----------------------------------------------------------------------------------|----------------------------------------------|---------------------------------------------------------------------------------------------------------------------------------------------------------|
| Hoyle, et al. 2018<br>[129]                    | 17-years-old female<br><i>Achromobacter xylosoxidans</i> CF                      | phage cocktail<br>Inhale + oral              | No safety monitoring.                                                                                                                                   |
| Chan, et al. 2018<br>[130]                     | 76-year old male<br><i>P. aeruginosa</i><br>aorto-cutaneous<br>fistula infection | phage OMKO1<br>Instill                       | The patient had no complaints with<br>stable vital signs and had laboratory<br>values within normal limits.                                             |
| Ujmajuridze et al.<br>2018 [26]<br>Switzerland | UTI case serial<br>with different<br>pathogen                                    | phage cocktail Pyo<br>Intravesical<br>(I.O.) | One patient experienced sudden fever<br>and chills on the third day of PT. No<br>bacteriophage-associated adverse<br>events have been detected.         |
| Schooley, et al. 2017<br>[25]                  | 68-year old female<br><i>A. baumannii</i><br>Pancreatitis                        | Cocktail with 9 phages<br>I.V. + Instill     | Phage neutralization antibody appeared<br>in plasma (in vitro); PT was withheld for<br>increased pressor requirements two<br>days following initiation. |
| Zhvania, et al. 2017<br>[131]<br>Georgia       | 16-year-old male;<br><i>S. aureus</i><br>skin infection                          | Sb1,<br>Topical,                             | No adverse reactions.                                                                                                                                   |
| Jennes, et al. 2017<br>[132]<br>Belgium        | 61-year-old male<br><i>P. aeruginosa</i><br>Septicaemia;                         | Phage cocktail BFC1<br>I.V. + Instill        | No adverse events, clinical<br>abnormalities or changes in lab test<br>related to phages                                                                |
| Fish et al. 2016 [133]                         | Case series,<br><i>S. aureus</i><br>diabetic foot ulcer                          | Sb-1;<br>Topical                             | No adverse events reported                                                                                                                              |
| Fadlallah et al. 2015<br>[134]<br>France       | 65-year-old female<br><i>S. aureus</i><br>corneal abscess                        | phage SATA-8505<br>Topical                   | No adverse events reported                                                                                                                              |
| Rose et al. 2014<br>[135]<br>Belgium           | burn wounds<br>case serial<br>with <i>S. aureus</i> and<br><i>P. aeruginosa</i>  | phage cocktail BFC-1;<br>Topical             | No adverse events, clinical<br>abnormalities or changes in laboratory<br>test related to the application of phages                                      |
| Khawaldeh, et al.<br>2011 [136]                | 67-year-old female<br><i>P. aeruginosa</i><br>UTI                                | Pyophage<br>Instill                          | No adverse events reported.                                                                                                                             |
| Kvachadze, et al.<br>2011[137]                 | 7-year-old female <i>S. aureus</i> and <i>P. aeruginosa</i><br>CF                | Sb-1 and Pyophage<br>Nebulizer               | No adverse events reported.                                                                                                                             |
| Letkiewicz, et al. 2009<br>[138]<br>Poland     | Case series;<br><i>E. faecalis</i><br>chronic prostatitis                        | Coliphage<br>Intrarectal                     | No change significantly in the function of<br>liver, pancreas, kidney, and bone<br>marrow immune function                                               |

**Supplementary Table S3. Clinical Trials of Phage Therapy (7/14)**

| Reference                                | Trial                                                 | Phage administration                 | Main safety outcomes                                                                                                                                                                                                                    |
|------------------------------------------|-------------------------------------------------------|--------------------------------------|-----------------------------------------------------------------------------------------------------------------------------------------------------------------------------------------------------------------------------------------|
| Leitner et al., 2020 [99]<br>Switzerland | Phase I/II clinical trial (UTI)                       | Pyophage<br>Intravesical (I.O.)      | Safety assessment included frequency and severity of adverse events during the treatment period according to the (CTCAE) v4.0 as grade 1 to 5.                                                                                          |
| Grubb et al., 2020 [44]                  | Phase I/II clinical trial (gastrointestinal distress) | PreforPro<br>Oral                    | glucose, BUN, creatinine (CRE), creatinine kinase (CK), NA+, K+, Cl- and C-reactive protein; a daily stool log, and gut microbial populations.                                                                                          |
| Petrovic Fabijan et al. 2020 [139]       | Phase I clinical trial (endocarditis, sepsis)         | AB-SA01<br>I.V.                      | The vital signs, clinical, haematological and blood biochemical parameters. The local adverse effects and systemic adverse reactions and evidence of renal or hepatic dysfunction. No adverse reactions were reported.                  |
| Ooi et al. 2019 [32]                     | Phase I clinical trial (Rhinosinusitis)               | AB-SA01;<br>Topical                  | Vital signs, physical examinations, clinical laboratory test results, and adverse events. Intranasal phage treatment was well tolerated, with no serious adverse events or deaths reported.                                             |
| Febvre, et al. 2019 [30]                 | Phase I clinical trial                                | Coliphage cocktail<br>Oral;          | a small but significant decrease in circulating IL-4 according the system inflammatory examination.                                                                                                                                     |
| Gindin, et al. 2019 [96]                 | Phase I clinical trail                                | coliphages<br>Oral                   | No difference in liver and kidney function and metabolic parameters;<br>No adverse events observed by self-report or clinical exam.                                                                                                     |
| McCallin, et al. 2018 [31]<br>Belgium    | Phase I clinical trial                                | Pyophage cocktail;<br>Oral or Nasal; | No difference in physical conditions; No different in clinical lab exam. No adverse events related to phage administration. The body temperature showed more fluctuations, but fever was only rarely observed and did not exceed 38 °C. |
| Sarker, et al. 2017 [47]<br>Switzerland  | Phase I clinical trial                                | Two coliphage cocktails<br>Oral      | No viable coliphage in the serum; No difference in physical conditions; No difference in clinical lab exam. No serum was positive for LPS; No antibody increasing to LPS or phage. No adverse effects.                                  |



|                                              |                                                         |                                   |                                                                                                                                                                                                  |
|----------------------------------------------|---------------------------------------------------------|-----------------------------------|--------------------------------------------------------------------------------------------------------------------------------------------------------------------------------------------------|
| McCallin, et al. 2013<br>[46]<br>Switzerland | Phase I clinical trial                                  | coliphage cocktail<br>Oral        | No safety issues reported according the physical data, clinical lab exam and no phage or phage antibody in serum detected. No adverse effects<br>Have no impact on fecal microbiota composition. |
| Sarker, et al. 2012<br>[48]                  | Phase I clinical trial                                  | T4-like phage cocktail<br>Oral    | No subjects complain; No safety issues reported according the vital sign, clinical lab exam, No adverse effects and impact on fecal microbiota composition.                                      |
| Rhoads, et.al 2009<br>[140]                  | Phase I clinical trial<br>(venous leg ulcers)           | WPP-201 phage cocktail<br>Topical | No safety issues reported according the vital sign, lab exam.                                                                                                                                    |
| Jault, et al. 2019<br>[141]<br>France        | Phase I/II clinical trial<br>(burn patient)             | phages cocktail PP1131<br>Topical | No substantially different in vital sign, physical examinations                                                                                                                                  |
| Sarker, et al. 2016<br>[142]<br>Switzerland  | Phase I/II clinical trial<br>(Acute bacterial diarrhea) | Two coliphages cocktails<br>Oral  | No changes in physical examinations and vital sign. No adverse events.                                                                                                                           |
| Wright. A. el, at. 2009<br>[95]<br>UK        | Phase I/II clinical trial<br>(chronic otitis)           | Biophage-PA Cocktail;<br>Topical  | No reportable side effects from patient, and no evidence of local or systemic toxicity.                                                                                                          |

---
